# Supplementary material
Source: MDPI journal article supplement (https://www.mdpi.com/2227-9040/11/11/552)
Supplement: s1 [file s1]

# Investigation of WO<sub>3</sub> and BiVO<sub>4</sub> Photoanodes for Photoelectrochemical Sensing of Xylene, Toluene and Methanol

Milda Petruleviciene <sup>1</sup>, Irena Savickaja <sup>1</sup>, Jurga Juodkazyte <sup>1</sup> and Arunas Ramanavicius <sup>1,2,\*</sup>

<sup>1</sup> Centre for Physical Sciences and Technology, Sauletekio Av. 3, 10257 Vilnius, Lithuania; milda.petruleviciene@ftmc.lt (M.P.); irena.savickaja@ftmc.lt (I.S.); jurga.juodkazyte@ftmc.lt (J.J.)

<sup>2</sup> Department of Physical Chemistry, Faculty of Chemistry, Vilnius University, 03225 Vilnius, Lithuania

\* Correspondence: arunas.ramanavicius@chf.vu.lt; Tel.: +370-(60)-032332; Fax: +370-(52)-469210

## Supplementary information

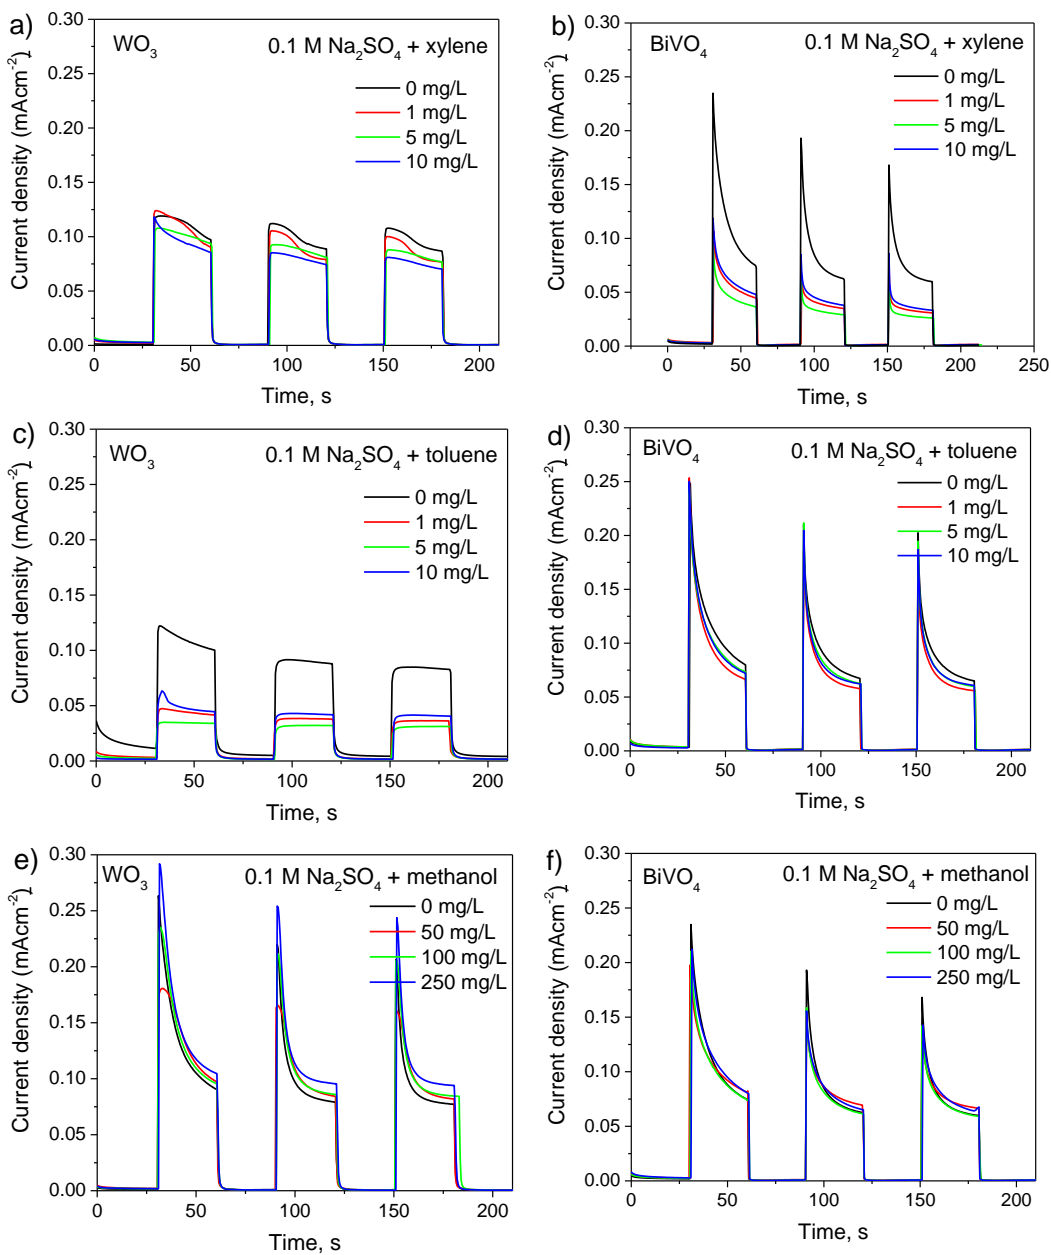

**Figure S1.** Chronoamperograms of WO<sub>3</sub> (a, c, e) and BiVO<sub>4</sub> (b, d, f) photoanodes in 0.1 M NaCl electrolyte with and w/o xylene, toluene and methanol; chopped illumination, 1.4 V (vs Pt).

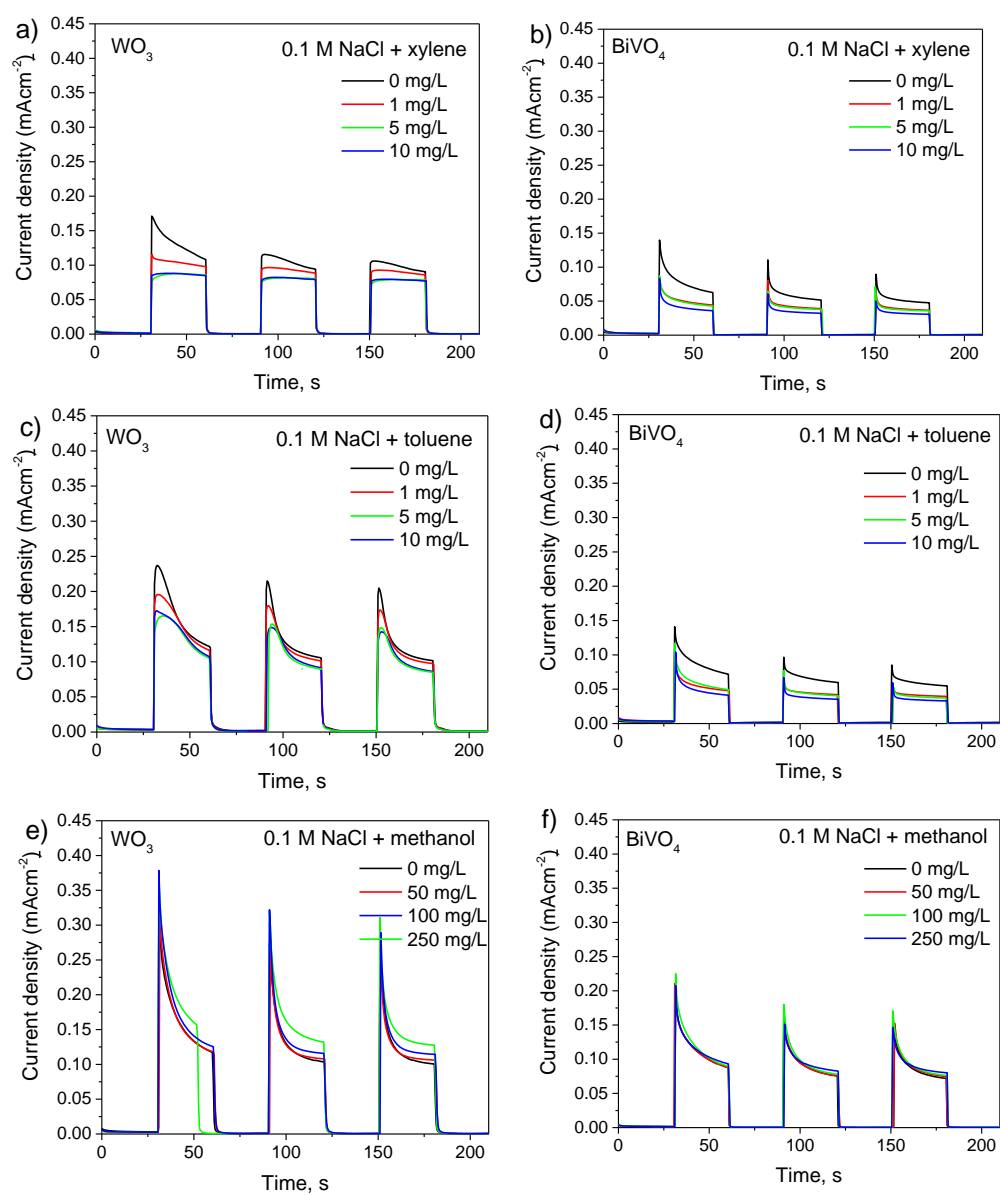

**Figure S2.** Chronoamperograms of  $\text{WO}_3$  (a, c, e) and  $\text{BiVO}_4$  (b, d, f) photoanodes in 0.1 M  $\text{Na}_2\text{SO}_4$  electrolyte with and w/o xylene, toluene and methanol; chopped illumination, 1.4 V (vs Pt).
